# Supplementary material for: Isolation of an Extract from the Soft Coral Symbiotic Microorganism Salinispora arenicola Exerting Cytoprotective and Anti-Aging Effects
Source: MDPI journal article supplement (doi:10.3390/cimb44010002), 2021-12-22
Supplement: s1 [file s1]

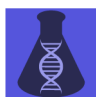

# Isolation of an Extract from the Soft Coral Symbiotic Microorganism *Salinispora arenicola* Exerting Cytoprotective and Anti-Aging Effects

Xanthippi P. Louka <sup>1</sup>, Aimilia D. Skirou <sup>1</sup>, Géraldine Le Goff <sup>2</sup>, Philippe Lopes <sup>2</sup>, Eleni-Dimitra Papanagnou <sup>1</sup>, Maria S. Manola <sup>1</sup>, Yehuda Benayahu <sup>3</sup>, Jamal Ouazzani <sup>2</sup> and Ioannis P. Trougakos <sup>1,\*</sup>

## Supplemental materials

Table S2: Full names of analyzed genes ([www.ncbi.nlm.nih.gov/gene](http://www.ncbi.nlm.nih.gov/gene)).

| Full name                             | Human Gene           |
|---------------------------------------|----------------------|
| Hydroxymethylbilane synthase          | <i>HMBS</i>          |
| Proteasome 20S subunit beta 6         | <i>PSMB6</i>         |
| Proteasome 20S subunit beta 7         | <i>PSMB7</i>         |
| Proteasome 26S subunit, non-ATPase 14 | <i>PSMD14/ RPN11</i> |
| Cathepsin B                           | <i>CTSB</i>          |
| Cathepsin L                           | <i>CTSL</i>          |
| Cathepsin D                           | <i>CTSD</i>          |
| Sequestosome 1                        | <i>SQSTM1</i>        |
| NAD(P)H quinone dehydrogenase 1       | <i>NQO1</i>          |
| Thioredoxin reductase 1               | <i>TXNRD1</i>        |

## Supplementary Figures

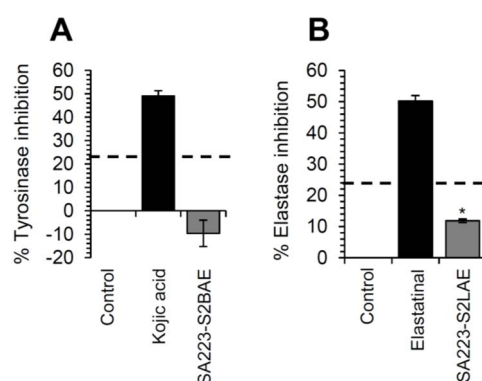

**Figure S1.** *In vitro* evaluation of tyrosinase and elastase inhibition activity. (A) (%) Tyrosinase inhibition activity by the SA223-S2BAE extract at the concentration of 150  $\mu\text{g/mL}$ . (B) (%) Elastase inhibition activity by the SA223-S2LAE extract at the concentration of 100  $\mu\text{g/mL}$ . In (A), Kojic acid (2  $\mu\text{g/mL}$ ) was used as a positive control. In (B), elastatinal (0.5  $\mu\text{g/mL}$ ) was used as a positive control. Bars,  $\pm$  SD ( $n \geq 2$ ); \*,  $P < 0.05$ .

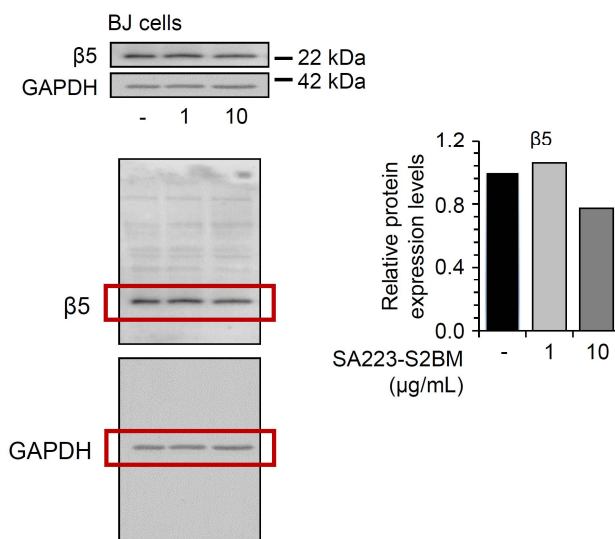

**Figure S2.** Full blots and quantitative analysis of protein expression levels (immunoblots shown in Figure 2).

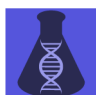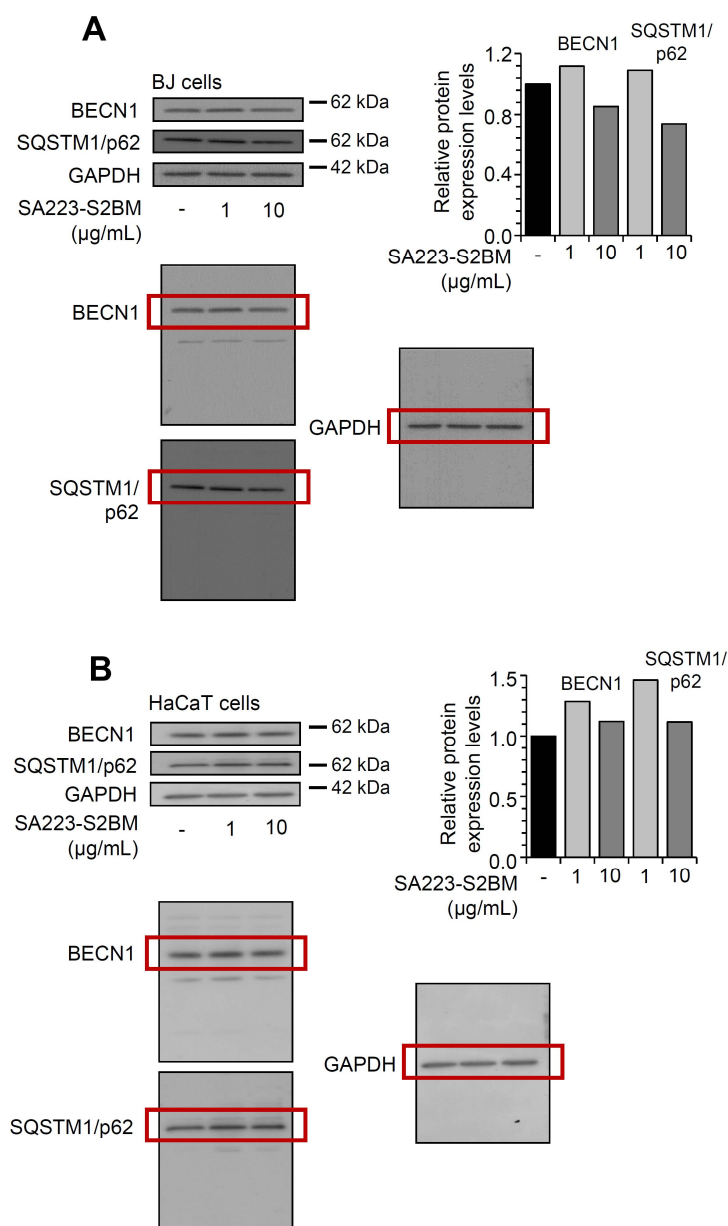

**Figure S3.** Full blots and quantitative analysis of protein expression levels (immunoblots shown in Figure 3).

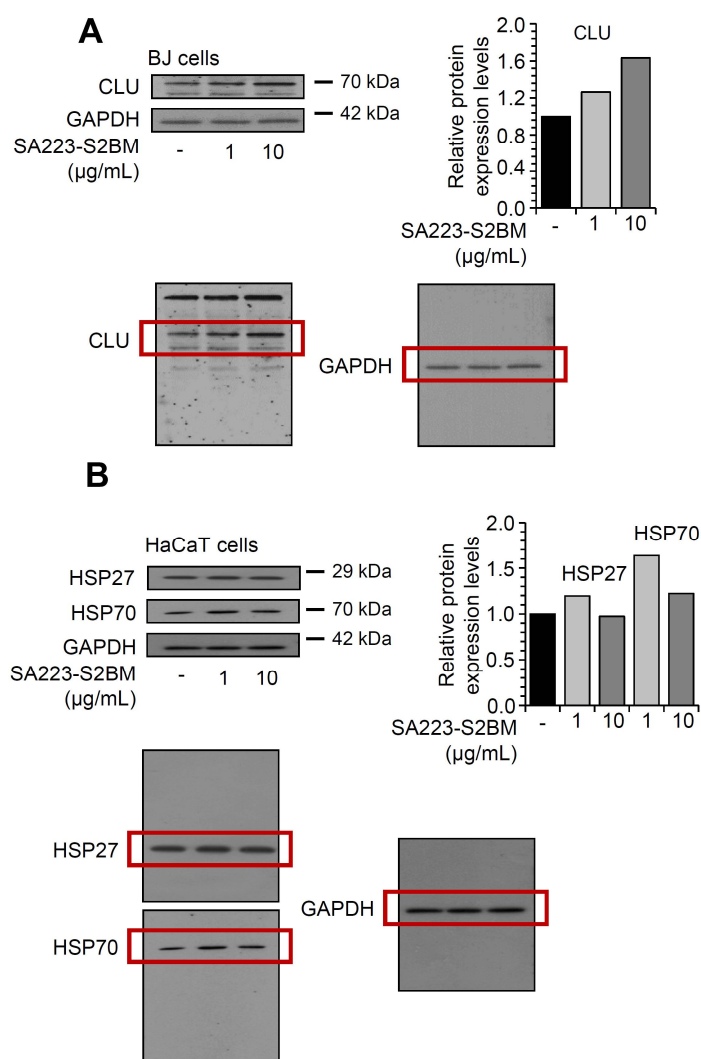

**Figure S4.** Full blots and quantitative analysis of protein expression levels (immunoblots shown in Figure 3).

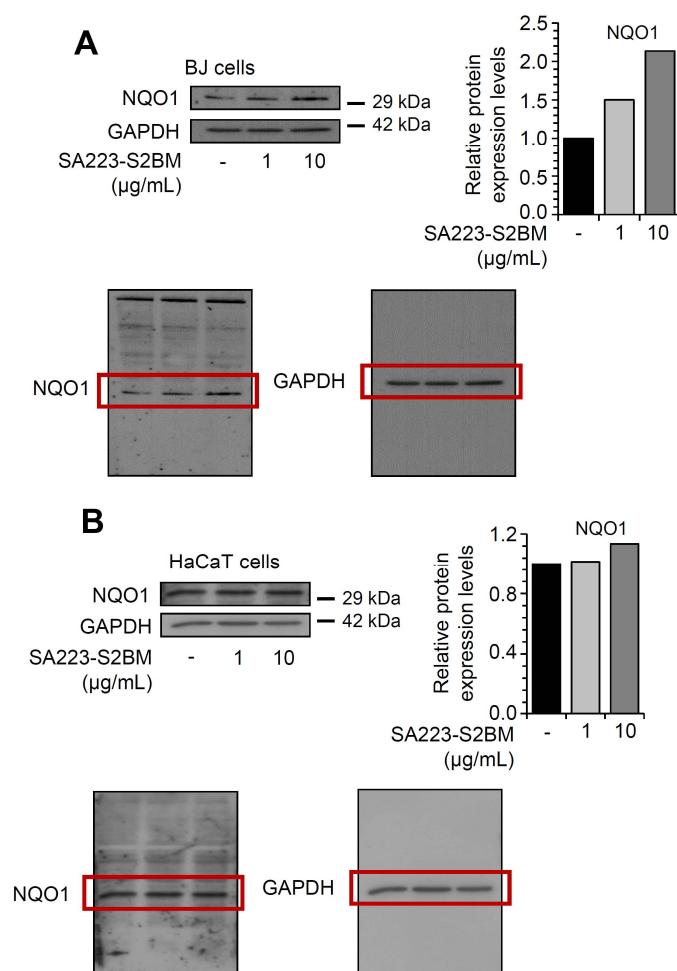

**Figure S5.** Full blots and quantitative analysis of protein expression levels (immunoblots shown in Figure 6).

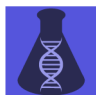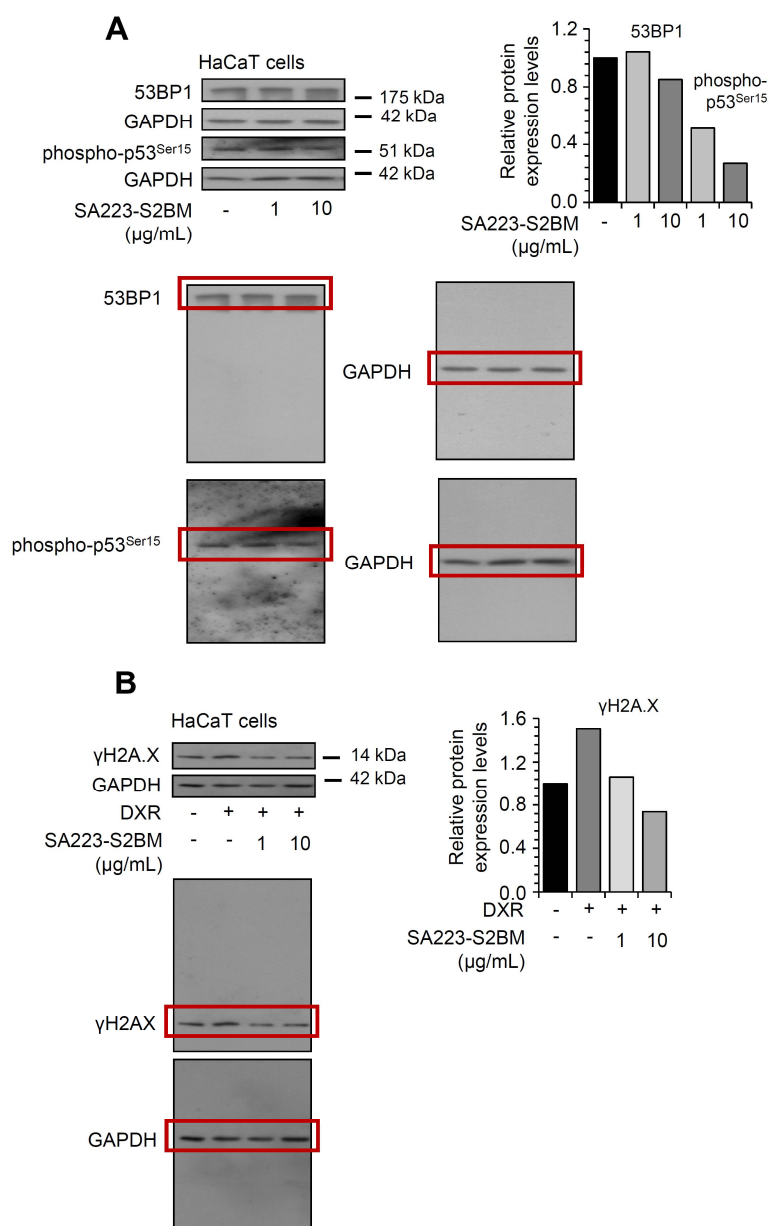

**Figure S6.** Full blots and quantitative analysis of protein expression levels (immunoblots shown in Figure 7).
