# Supplementary material for: Isolation of an Extract from the Soft Coral Symbiotic Microorganism Salinispora arenicola Exerting Cytoprotective and Anti-Aging Effects
Source: MDPI journal article supplement (doi:10.3390/cimb44010002), 2021-12-22
Supplement: s1 [file s1]

**Table S1.** Summary of lifespan experiments.

| Sample              | Genotype          | Mean Lifespan (LF) +/- s.e.m. (Days) |       | Median Lifespan +/- s.e.m. (Days) |       | % Median LF vs. control | Log Rank P Value |                    |                     |
|---------------------|-------------------|--------------------------------------|-------|-----------------------------------|-------|-------------------------|------------------|--------------------|---------------------|
|                     |                   |                                      |       |                                   |       |                         | Control          | 1 µg/mL SA223-S2BM | 10 µg/mL SA223-S2BM |
| Control             | w <sup>1118</sup> | 35.111                               | 1.633 | 34                                | 2.893 | 100                     |                  | 0.358              | 0.005               |
| 1 µg/mL SA223-S2BM  | w <sup>1118</sup> | 37.791                               | 1.290 | 35                                | 1.683 | 102.941                 | 0.358            |                    | 0.236               |
| 10 µg/mL SA223-S2BM | w <sup>1119</sup> | 33.133                               | 1.240 | 33                                | 2.190 | 97.059                  | 0.005            | 0.236              |                     |

| Total Animals Died/Total |
|--------------------------|
|                          |
| 117/121                  |
| 117/120                  |
| 117/121                  |
